# Supplementary material for: Cadmium isotope fractionation reveals genetic variation in Cd uptake and translocation by Theobroma cacao and role of natural resistance-associated macrophage protein 5 and heavy metal ATPase-family transporters
Source: PubMed Central journal article supplement (PMC7193571; doi:10.1038/s41438-020-0292-6), 2020-05-01
Supplement: 41438_2020_292_MOESM1_ESM.pdf [file 41438_2020_292_MOESM1_ESM.pdf]

*Supplementary Information to:*

**Cadmium isotope fractionation reveals genetic variation in Cd uptake and translocation by *Theobroma cacao* and role of natural resistance-associated macrophage protein 5 and Heavy Metal ATPase-family transporters**

**Rebekah E. T. Moore\***, r.moore13@imperial.ac.uk, Tel: 020 75 94 73 32, Department of Earth Science and Engineering, Imperial College London, London SW7 2BP, UK,

**Ihsan Ullah**, i.ullah@reading.ac.uk, School of Agriculture, Policy and Development, University of Reading, Reading RG6 6BZ, UK

**Vinicius H. de Oliveira**, who@unicamp.br, School of Agriculture, Policy and Development, University of Reading, Reading RG6 6BZ, UK. Present address: Department of Plant Biology, Institute of Biology, University of Campinas, Campinas, Sao Paulo 13083-970, Brazil

**Samantha J. Hammond**, sam.hammond@open.ac.uk, School of Environment, Earth and Ecosystem Sciences, The Open University, Milton Keynes MK7 6AA, UK

**Stanislav Strekopytov**, stanislav.strekopytov@lgcgroup.com, Imaging and Analysis Centre, The Natural History Museum, London SW7 5BD, UK. Present address: National Measurement Laboratory, LGC, Queen's Road, Teddington, TW11 0LY, UK

**Mark Tibbett**, m.tibbett@reading.ac.uk, School of Agriculture, Policy and Development, University of Reading, Reading RG6 6BZ, UK

**Jim M. Dunwell**, j.m.dunwell@reading.ac.uk, School of Agriculture, Policy and Development, University of Reading, Reading RG6 6BZ, UK

**Mark Rehkämper**, markrehk@imperial.ac.uk, Department of Earth Science and Engineering, Imperial College London, London SW7 2BP, UK

**Table S1.** Comparison of Cd concentrations and isotope compositions obtained for reference and quality control materials and comparison with literature data and results obtained for duplicate digests and analyses of roots and leaf samples from a single Matina 1-7 plant.

| Material                                     | Type         | n  | [Cd] $\pm$ sd<br>( $\mu\text{g g}^{-1}$ ) | [Cd] Lit.<br>( $\mu\text{g g}^{-1}$ ) | $\delta^{114/110}\text{Cd}$<br>$\pm$ 2sd (‰) | $\delta^{114/110}\text{Cd}$<br>Lit. (‰) |
|----------------------------------------------|--------------|----|-------------------------------------------|---------------------------------------|----------------------------------------------|-----------------------------------------|
| BAM-I012 <sup>a</sup>                        | Cd solution  | 16 | --                                        | --                                    | -1.32 $\pm$ 0.06                             | -1.33 $\pm$ 0.04                        |
| NIST SRM 1570a <sup>b</sup>                  | Spinach leaf | 4  | 2.709 $\pm$ 0.01                          | 2.876 $\pm$ 0.058                     | 0.44 $\pm$ 0.06                              | --                                      |
| IAEA-359 <sup>c</sup>                        | Cabbage leaf | 1  | 0.123                                     | 0.125 $\pm$ 0.005                     | --                                           | --                                      |
| MAGIC NA-702 <sup>d</sup>                    | Cacao leaf   | 10 | 107 $\pm$ 18                              | 102                                   | -0.55 $\pm$ 0.13                             | -0.50 $\pm$ 0.06                        |
| Sigma Aldrich CdCl <sub>2</sub> <sup>e</sup> | Cd additive  | 7  | --                                        | --                                    | -0.36 $\pm$ 0.04                             | --                                      |
| Matina 1-7 Digest a                          | Cacao root   | 1  | 195                                       | --                                    | -0.71 $\pm$ 0.05                             | --                                      |
| Matina 1-7 Digest b                          | Cacao root   | 1  | 218                                       | --                                    | -0.65 $\pm$ 0.07                             | --                                      |
| Matina 1-7 Digest a                          | Cacao leaf   | 1  | 3.79                                      | --                                    | -0.18 $\pm$ 0.06                             | --                                      |
| Matina 1-7 Digest b                          | Cacao leaf   | 1  | 2.96                                      | --                                    | -0.23 $\pm$ 0.05                             | --                                      |

n = number of individual samples that were digested and analysed. <sup>a</sup> The literature data are the mean result from Abouchami *et al.*, 2013.<sup>1</sup> <sup>b</sup> Cd concentration from certificate. No published  $\delta^{114/110}\text{Cd}$  data are available for this sample. <sup>c</sup> The published Cd result is an ‘Information value’ from the certificate that is based on results from 57 laboratories. <sup>d</sup> In-house quality control material prepared from cacao leaves, whereby the plant was grown in a hydroponic solution containing added Cd; the literature results for this sample are from Barraza *et al.*, 2019.<sup>2</sup> <sup>e</sup> Source of Cd that was added to the hydroponic solutions and the yeast culture medium.

**Table S2: Weights of the plant tissue samples**

| <b>Cacao clones</b> | <b>Leaf<br/>g</b> | <b>Root<br/>g</b> | <b>Stem<br/>g</b> | <b>Total plant<br/>g</b> |
|---------------------|-------------------|-------------------|-------------------|--------------------------|
| B 5/7 [POU]         | 0.554             | 0.092             | 0.246             | 0.892                    |
| Catie 1000          | 0.304             | 0.127             | 0.122             | 0.553                    |
| CC 41 (1)           | 0.463             | 0.101             | 0.231             | 0.795                    |
| CC 41 (2)           | 0.685             | 0.128             | 0.189             | 1.002                    |
| CL 19/10            | 1.361             | 0.159             | 0.289             | 1.809                    |
| GU 207/H            | 0.250             | 0.092             | 0.055             | 0.397                    |
| GU 263/V            | 0.332             | 0.144             | 0.089             | 0.565                    |
| IMC 27              | 0.301             | 0.132             | 0.147             | 0.580                    |
| LP 1/41 [POU]       | 0.635             | 0.101             | 0.259             | 0.995                    |
| Matina 1-7          | 1.387             | 0.269             | 0.499             | 2.155                    |
| NA 702              | 1.181             | 0.198             | 0.341             | 1.720                    |
| PNG 340             | 0.940             | 0.206             | 0.551             | 1.697                    |
| POUND 12/A [POU]    | 0.525             | 0.121             | 0.139             | 0.785                    |
| RB46                | 0.512             | 0.134             | 0.140             | 0.786                    |
| RIM 189 [MEX]       | 1.298             | 0.299             | 0.334             | 1.931                    |
| SCA 9               | 0.668             | 0.122             | 0.262             | 1.053                    |
| SPA 9 [COL]         | 0.535             | 0.127             | 0.218             | 0.880                    |
| TARS 31             | 0.534             | 0.280             | 0.181             | 0.994                    |
| TSA 654             | 0.616             | 0.138             | 0.153             | 0.907                    |
| U 70 [PER]          | 0.247             | 0.068             | 0.084             | 0.399                    |
| <b>Mean</b>         | <b>0.666</b>      | <b>0.152</b>      | <b>0.226</b>      | <b>1.045</b>             |
| <b>sd</b>           | <b>0.361</b>      | <b>0.064</b>      | <b>0.127</b>      | <b>0.514</b>             |

**Table S3.** Name, accession number and donor organization of the cacao germplasm used in the study.

| <b>Clone Name</b> | <b>Accession number<br/>(ICQC, R)</b> | <b>Donor Collection</b> |
|-------------------|---------------------------------------|-------------------------|
| B 5/7 [POU]       | RUQ 522                               | ICG, T                  |
| CATIE 1000        | RUQ 844                               | CIRAD                   |
| CC 41             | RUQ 1428                              | ICG, T                  |
| CL 19/10          | RUQ 905                               | ICG, T                  |
| GU 207/H          | RUQ 225                               | CIRAD                   |
| GU 263 /V         | RUQ 1545                              | CIRAD                   |
| IMC 27            | RUQ 515                               | ICG, T                  |
| LP 1/41 [POU]     | RUQ 353                               | ICG, T                  |
| MATINA 1/7        | RUQ 1333                              | ICG, T                  |
| NA 702            | RUQ 1587                              | ICG, T                  |
| PNG 340           | RUQ 1304                              | CIRAD                   |
| POUND 12/A        | RUQ 1458                              | ICG, T                  |
| RB 46 [BRA]       | RUQ 134                               | CATIE                   |
| RIM189 [MEX]      | RUQ 310                               | CATIE                   |
| SCA 9             | RUQ 1064                              | ICG, T                  |
| SPA 9 [COL]       | RUQ 235                               | ICG, T                  |
| TARS 31           | RUQ 1394                              | USDA-TARS               |
| TSA 654           | RUQ 1029                              | CEPLAC/CEPEC            |
| U 70 [PER]        | RUQ 1488                              | UNAS                    |

|           |                                                                                                        |
|-----------|--------------------------------------------------------------------------------------------------------|
| CATIE     | Centro Agronómico Tropical de Investigación y Enseñanza (Costa Rica)                                   |
| CEPLAC    | Comissão Executiva do Plano da Lavoura Cacaueira (Brazil)                                              |
| CIRAD     | Centre de cooperation internationale en recherche agronomique pour le développement (France)           |
| ICG, T    | International Cocoa Genebank (Trinidad)                                                                |
| ICQC, R   | International Cocoa Quarantine Centre, Reading (UK)                                                    |
| UNAS      | Universidad Nacional Agraria de la Selva (Peru)                                                        |
| USDA-TARS | United States Department of Agriculture, Tropical Crops and Germplasm Research, Mayaguez (Puerto Rico) |

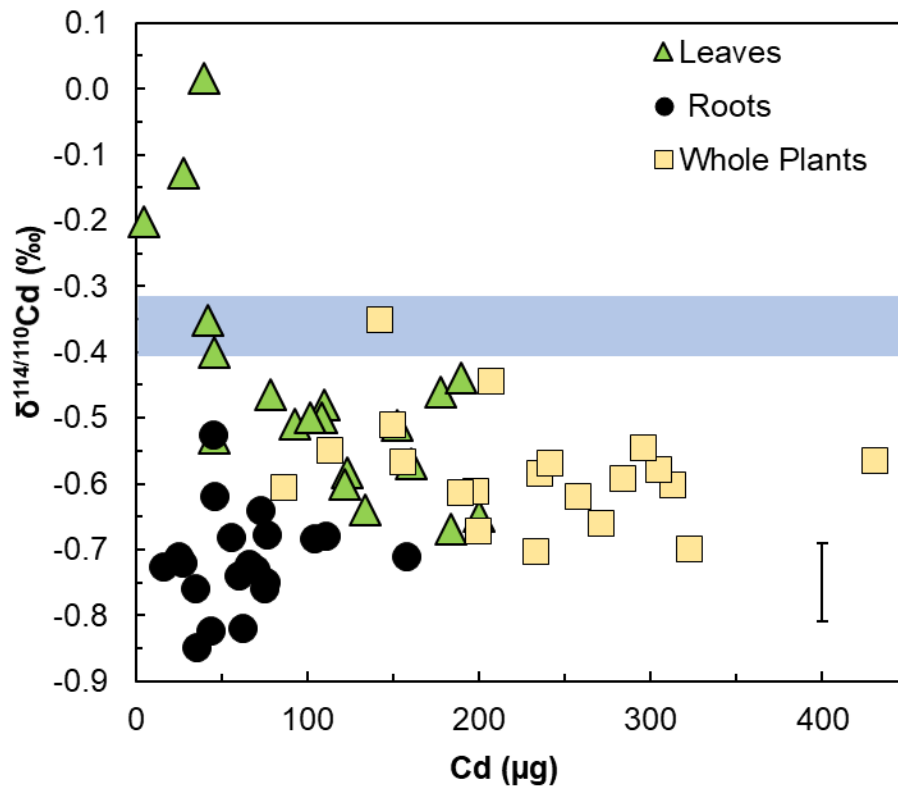

**Fig. S1.** Plot of  $\delta^{114/110}\text{Cd}$  versus Cd for the leaf, root and whole plant samples of the 19 cacao clones.

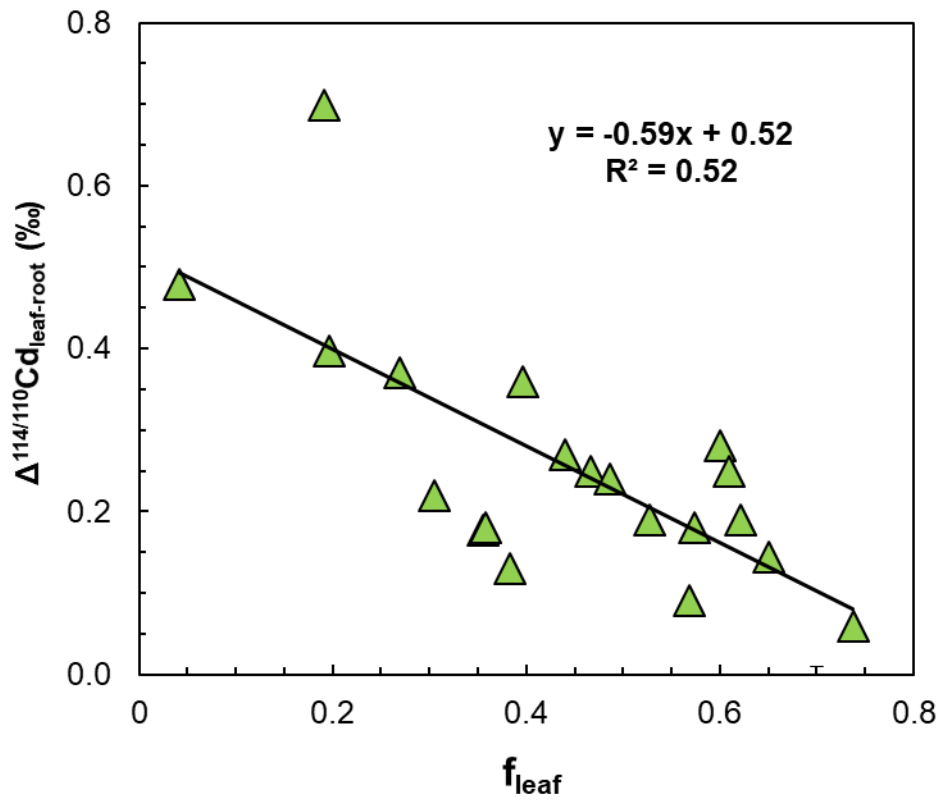

**Fig. S2.** Plot of  $\Delta^{114/110}\text{Cd}_{\text{leaf-root}}$  versus mass fraction of Cd present in leaves ( $f_{\text{leaf}}$ ) of the 19 analysed cacao clones. A scattered but clear negative correlation is apparent.



### Note S1: Calculation of Cd inventories for cacao stem and total plants

In this study, the stems of the cacao clones were weighed (alongside roots and leaves; Table S3) but not analysed to determine Cd isotope compositions and concentrations. To enable estimates for the Cd mass and isotope budgets of the total plants, the stems were assigned Cd concentrations  $[Cd]_{\text{stem}}$  at the midpoint of the results obtained for roots and leaves:

$$[Cd]_{\text{stem}} = 0.5 [Cd]_{\text{root}} + 0.5 [Cd]_{\text{leaf}} \quad (\text{Eq. 1})$$

The estimated  $[Cd]_{\text{stem}}$  data were used in conjunction with  $[Cd]_{\text{root}}$ ,  $[Cd]_{\text{leaf}}$  and the weights of the plant organs (Table S3) to determine the mass fractions of Cd present in the roots, stems and leaves ( $f_{\text{root}}$ ,  $f_{\text{stem}}$ ,  $f_{\text{leaf}}$ ). These data were then applied to determine  $\delta^{114/110}\text{Cd}_{\text{stem}}$ :

$$\delta^{114/110}\text{Cd}_{\text{stem}} = f_{\text{root}} \delta^{114/110}\text{Cd}_{\text{root}} + f_{\text{leaf}} \delta^{114/110}\text{Cd}_{\text{leaf}} \quad (\text{Eq. 2})$$

This approach is firmly supported by published Cd data for plants (see below). The estimated  $[Cd]_{\text{stem}}$  and  $\delta^{114/110}\text{Cd}_{\text{stem}}$  values were subsequently applied to calculate the Cd concentrations, contents and isotope compositions of the total cacao plants.

To obtain uncertainty estimates for the cocoa plant Cd (isotope) mass balances, it was assumed (again in accord with literature data; see below) that deviations from the estimate provided by Eq. 1 are typically evidenced by stem compositions that are more similar to the roots than the leaves. Based on this, the most extreme stem composition that was evaluated to define the maximum  $\pm$  uncertainty for each clone was thus calculated as:

$$[Cd]_{\text{stem}} = 0.75 [Cd]_{\text{root}} + 0.25 [Cd]_{\text{leaf}} \quad (\text{Eq. 3})$$

whereby the respective  $\delta^{114/110}\text{Cd}_{\text{stem}}$  value was subsequently determined using Eq. 2. The propagated uncertainty estimates for  $\delta^{114/110}\text{Cd}_{\text{tot}}$  and  $\Delta^{114/110}\text{Cd}_{\text{leaf-tot}}$  furthermore encompass the analytical errors of the Cd isotope measurements.

Use of the mass balance calculations to estimate the Cd (isotope) inventory of the cacao stems increases the uncertainties for the Cd (isotope) budgets of the total plants. Nonetheless, the approach is useful, reasonable and justified by evidence, practical constraints and the limited impact on the error propagation:

- The reduced number of Cd isotope analyses that are required with the approach significantly reduces the overall analytical cost of the project, as the measurements are associated with considerable cost and staff effort. This was helpful as the resources available for the research were limited.



- Coupled Cd isotope and concentration data that are directly comparable to the results generated in this study are available for cereals wheat, barley<sup>3,4</sup> and Cd accumulators (Cd tolerant *Ricinus communis*, Cd hyperaccumulator *Solanum nigrum*.<sup>5</sup> These literature data were evaluated carefully and used to develop and justify the approach applied here. In detail, the literature results show that the [Cd] and  $\delta^{114/110}\text{Cd}$  values for (i) the straw of wheat/barley are consistently intermediate between the results obtained for roots and grains; (ii) the stems of Cd accumulators are nearly always intermediate between the data for roots and leaves. On average, it is also apparent that the Cd concentrations of the stems/straw of these plants are typically roughly midway between the root and leaf/grain values, whereby most deviations reflect stem results that are somewhat closer to the root rather than the leaf/grain data. As such, the available evidence yields credence to the mass balance approach used here to estimate  $[\text{Cd}]_{\text{stem}}$  and  $\delta^{114/110}\text{Cd}_{\text{stem}}$  and further values derived from these parameters.
- The estimated mass fraction of Cd in the cacao clone stems varies between 15% and 48% with a mean result of  $f_{\text{stem}} = 28 \pm 10\%$  (1sd). As such, the stems play an important but not a dominant role in the Cd (isotope) budgets of the cacao clones. Due to this, and even using a conservative estimate for the uncertainty of  $[\text{Cd}]_{\text{stem}}$  and  $\delta^{114/110}\text{Cd}_{\text{stem}}$  (see above), error propagation does not generate unduly large error bars for values such as  $f_{\text{leaf}}$  and  $\Delta^{114/110}\text{Cd}_{\text{leaf-tot}}$  (Fig. 3). In fact, the propagated uncertainties are sufficiently small, such that compositional and isotopic differences between the cacao clones are still clearly apparent and can be used to define systematic data trends in Figs. 2, 3 and S2.
- Finally, the validity of the mass balance approach is also demonstrated by the research findings: (i) the measured  $\delta^{114/110}\text{Cd}$  values show similar correlations with  $[\text{Cd}]_{\text{leaf}}$  and  $\text{Cd}_{\text{leaf}}$  (which were both directly measured; Figs. 2a and S1) as well as  $f_{\text{leaf}}$  (which was calculated; Fig. 2b); (ii) a clear trend is observed for  $\Delta^{114/110}\text{Cd}_{\text{leaf-tot}}$  (which combines measured and calculated data) with  $f_{\text{leaf}}$  (Fig. 5). The observed trends are unlikely to be fortuitous but most likely characterise the systematic distribution of Cd (and its isotopes) within the cacao plant, in accord with observations made in previous studies on cereals and Cd accumulators.<sup>3-5</sup>

**Note S2: List of the gene sequences used in the study**

***TcHMA2\_MT151685***

ATGGATGCGAATAAAAACTGCAGAAAAGCTACTTCGATGTGCTGGGTATCTGC  
TGCTCCTCGGAGGTTGCTCAGATAGAAAACATCTTAAAATCCCTTGAAGGCGTCA  
AAGAAGTATCTGTGATTGTTCCCTACCAGAACAGTTATTGTTCTCCATGACAATCT  
CCTCGTTTCTCAGCTTCAAATAGTTAAGGCTCTAAATCAAGCAAGACTGGAAGCA  
AACGTTTCGAGCGCGTGGGGAGATCAAGTACCAGAAAAAATGGCCCAGCCCTTTT  
GCAATAGCTTGTGGCTTGCTGCTTTTGTTCCTACTGTTGAAGTATGCATACCATCC  
ATTGCAATGGCTAGCCGTAGGAGCTGTGGCCGTTGGCATCTACCCCATGCTGTTG  
AAGGGCTATGCAGCCGTTAGGAATTCAGGCTCGATATCAACATTCTTATGCTCA  
GTGCAGCGATAGGGAGCATTGCAATGAAGGACTACACTGAAGCTGGCACTATCG  
TCTTCTCTTACCCTGCGGAATGGCTTGAGTCAAGAGCAAGCCATAAGGCTAC  
TGCTGTCATGTCCTCGTTGATGAGTATAGCTCCTCAGAAAGCAGTCATAGCTGAG  
ACAGGAGAAGAAGTGGATGCCGATGAAGTCAAATTGAGCACTGTTCTCGCCGTT  
AAGGCTGGTGAAGTTATACCCATTGATGGAATTGTTGTAGATGGGAAATGTGAA  
GTGGATGAGAAAACCCTTACTGGTGAATCACTTCCAGTTACCAAAGAAAAGGAT  
TCAACTGTCTGGGCTGGCACCATCAATCTAAACGGTTACATTAGTGTA AAAACTA  
CTGCTGTAGCTGAAGACTGTGTAGTGGCTAAAATGGCGAAGCTAGTGGAGGAAG  
CTCAAAACAACAATCTAGAACCCAAAGATTCATAGACAAATGTGCCCAGTTCT  
ACACCCAGCAATTGTAATTGTATCAGCCGCCATTGCTGTGATTCCAGCTGCACT  
GAGAGTGCATAACCTTCACAACCTGGTTTCACTTAGCATTGGTTGTCTTGGTGAGT  
GCATGTCCATGTGCTCTTATCCTTTCTACACCTGTTGCAAGTTTTTGTGCACTTAC  
AAAAGCTGCAACATCAGGACTTCTAGTTAAGGGTGGCGACTATCTTGAAATTCTT  
TCCAAAATTAAGATCACAGCTTTTGACAAAACCTGGTACACTTACGAGGGGTGAA  
TTTGTGTGACCGATTTTCGATCTCTTTGTGAAGATATAAGCTTGAACACATTGCT  
TACTGGGTTTCAAGCGTTGAGAGTAAGTCCAGTCATCCAATGGCAGCTGCACTT  
GTAGAATATGGAAGGTCACATTCCATCGAACCAAACCTGAAACTGTTGAGGAT  
TATCACAATTTCCCTGGGGAAGGTATTTATGGGAGGATTGATGGCAGAGATATTT  
ACATTGGAAGCAGAAAAATTTCACTGAGAGCTCATGGAACAGTTCCAAGTCTAG  
AAGGCAATATGATTGAAGGAAAGACCATTGGATATGTGTTTTCTGGAGCAACCC  
CTGCTGGAATTTCCGTCTTTCAGATGCTTGTGCGAACTGGGGCTGCAGAGGCAGT  
CAATGAGCTAAAGTCAATGGGGATAAAAGCTGCTATGCTTACAGGAGATAATCA  
AGCAGCAGCCATACATGTACAAGAACAGCTAGGGAATCGTCTAGATGAAGTCCA  
TGCAGAACTTCTCCTGAAGACAAGGCAAGAATAATCGAAGAGCTTAGGAAAGA  
GGGGCCAACAGCAATGATTGGAGATGGCATCAATGATGCACCTGCACTTGCTAC  
AGCTGATATTGGTATTTCAATGGGCATTTTCGGGTTTCAGCACTTGCAGACAGAGACA  
GGGCATGTGATTCTCATGTCAAATGACATTAGAAAAGATACCAAAGCTATCCAA  
CTGGCAAGAAAGGCACATAGGAAAGTCATTGAGAATGTCATTTTGTCAATCAGT  
ACTAAGGCTGCTATTCTTGCTTTGGCCTTTGCTGGTCATCCACTTGTGTGGGCTGC  
GGTTCTTGCTGATGTTGGCACATGCTTGTGTTGGTGTATCTGTAATAGCATGCTACTTT  
TGCGAGGAACACACAAACATGCAGGAAAATGTAGCAAATCTTCGGCTGCATCAC

ATACAGACAAAAAAGGATGCAAAAACCAGTCATTGCCGCTTATCTGATAACCATG  
AACATGCTAGCACAGACAAAAAAGTTCAAAAGCTGTGTGAGCCTAAAAGATGTT  
TGTCGCAGAGGTGTGCCTCAAAATGTCAATCTAGCCCTTTC AATTCAGATTCATG  
TTCAAATTCATGTGGGAGCAATAAATGTGCGGACTCAGCAAGGACACACGATGG  
TTCTGTTAGTGATGGATCCCTTGAAGCAAAGCACTGTGACCAGGGTAGCTGTTGC  
ATGGTCAATGACAAACGTGCAGGAAAATGTTGCAGATCTTCAACTGCATCACAT  
ACAGACAAACATGGATGCAAAAACCTTTCATGGCCACTCATCTCATAACCATCAAC  
ATGCTATCATAGACCAAAAAGTCCAAAAGCCGTGTGCGCCTAAAAAATGTTCCCT  
CGCAGAAGTGTGCCGCAAAAATGTCAATCTAGCCCTTTCGGTACAGATTCATGTT  
TGTGGACTCAGCAAGGGCACACGATGGTTCTGTTAATGATAGATCCCATGAAGA  
AAAGCACTGTGACCAGGGAAGCTGTTGCATGGTCAATGACAAGACTGAGGCACA  
CAATTTGTCCAGCAACTGTTGTTTCAGGCAATCGGAGTTTGGGCTTGAACACTGAA  
GATAAATGCAGAAAAGCTAGTTACTGCGTAGAAGACCAGCGAGAGACAAAAAT  
GGTCATTGTCATTCTGTTTCATTGCGGTGAAAACCATGTTAAGAACCACACTAACG  
ATAAAGCTTTAGGAACTTGGTAGAACATAGTTCTTCGGAGAGCCTAAATCCAA  
AGGCTTATTCTCATCCACACAAGTGTGTATAGACTACAGTGATCAGCCACCTCA  
CACTGCAATAGACATTCCGATGAGTTCAGACTTTGAGGCTGCTAAAGCTCGTACG  
ACTCTGGAGAAGAGAGAATTTGGTGGTTGTTGCAAGAGCTATATGAGAGAATGC  
TGTGGTAAGCATGGACATTTTGGACCTGGCCTTGGAGGAGGCTTAGCAGAAATA  
ACCACTGAATAG

***TcHMA3\_MT151686***

ATGGATGCGAATAAAAAACTGCAGAAAAGCTACTTTGATGTGCTGGGTATCTGCT  
GCTCCTCGGAGGTTGCTCAGATAGAAAACATCTTAAAATCCCTTGAAGGCGTCAA  
AGAAGTATCTGTGATTGTTCCCTACCAGAACAGTTATTGTTCTCCATGACAATCTC  
CTCGTTTCTCAGCTTCAAATAGTCAAGGCTCTAAATCAAGCAAGACTGGAAGCAA  
ACGTTTCGAGCGCGTGGGGAGATCAAGTACCAGAAAAAATGGCCCAGCCCTTTTG  
CAATAGCTTGTGGCTTGTGCTTTTTGTTTTCACTGTTGAAGTATGCCTACCATCCA  
TTGCAATGGCTAGCCGTAGGAGCTGTGGCCGTTGGCATCTACCCCATGCTTTTGA  
AGGGCTATGCGGCCGTTAGGAATTTAGGCTCGATATCAACATTCTTATGCTCAG  
TGCAGTGATAGGGAGCGTTGCAATGAAGGACTACACTGAAGCTGGCACTATCGT  
CTTCTCTTACCCTGCAGAATGGCTTGAGTCAAGAGCAAGCCATAAGGCTACT  
GCTGTTATGTCCTCGTTGATGAGTATAGCTCCTCAGAAAGCAGTCATAGCTGAGA  
CAGGAGAAGAAGTGGATGCCGATGAAGTCAAATTGAGCACTGTTCTCGCAGTTA  
AGGCTGGTGAAGTTATACCCATTGATGGAATTGTTGTAGATGGGAAATGTGAAGT  
GGATGAGAAAACCCTTACTGGTGAATCATTTCAGTTACCAAAGAAAAGGATTC  
AACTGTCTGGGCTGGCACCATCAATCTAAACGGTTACATTAGTGTA AAAACTACT  
GCTGTAGCTGAAGACTGTGTAGTGGCTAAAATGGCGAAGCTAGTGGAGGAAGCT  
CAAAACAGCAAATCTAAAACCCAAAGATTCATAGACAAATGTGCCCAGTTCTAC  
ACCCAGCAATTGTAATTGCATCAGCTGCCATTGCTGTGATTCCAGCTGCACTGA  
GAGTGCATAACCTTCACA ACTGGTTTTACTTAGCATTGGTTGTCTTGGTGAGTGC  
ATGTCATGTGCGCTTATCCTTTCTACACCTGTTGCAAGTTTTTGTGCACTTACAA

AAGCTGCAACATCAGGACTTCTAGTTAAGGGTGGCGACTATCTTGAAATTCTTTC  
CAAATTAAGATCACAGCTTTTGACAAAACCTGGTACACTTACGAGGGGTGAATTT  
GTTGTGACCGATTTTCGATCTCTTTGTGAAGATATAAGCTTGAACACATTGCTTTA  
CTGGGTTTCAAGCGTTGAGAGTAAGTCAAGTCATCCAATGGCAGCTGCACTTGTA  
GAATATGGAAGGTCACATTCCATTGAACCAAACCCTGAAACTGTTGAGGATTATC  
ACAATTTCCCTGGGGAAGGTATTTATGGGAGGATTGATGGCAGAGATATTTACAT  
TGGAAGCAGAAAAATATCACTGAGAGCTCATGGAACAGTTCCAAGTCTAGAAGG  
CAATATGATTGAAGGAAAGACCATTGGATATGTGTTTTCTGGAGCAACCCCTGCT  
GGAATTTTCAGCCTTTCAGATGCTTGTGCAACTGGGGCTGCAGAGGCAGTCAATG  
AGCTAAAGTCAATGGGGATAAAAGCTGCTATGCTTACAGGAGATAATCAAGCAG  
CAGCCATACATGTACAAGAACAGCTAGGGAATCGTCTAGATGAAGTCCATGCAG  
AACTTCTTCCTGAAGACAAGGCAAGAATAATCGAAGAGCTTAGGAAAGAGGGGC  
CAACAGCAATGATTGGAGATGGCATCAATGATGCACCTGCACTTGCTACAGCTG  
ATATTGGTATTTCAATGGGCATTTTCGGGTTTCAGCACTTGCGACAGAGACAGGGCA  
TGTGATTCTCATGTCAAATGACATTAGAAAGATACCAAAGCTATCCAAGTGGCA  
AGAAAGGCACATAGGAAAGTCATTGAGAATGTCATTTTGTCAATCAGTACTAAG  
GCTGCTATTCTTGCTTTGGCCTTCGCTGGTCATCCACTTGTGTGGGCTGCGGTTCT  
TGCTGATGTTGGCACATGCTTGTGGTGTGATCTGTAATAGCATGCTACTTTTGCAG  
GAACAGACAAACATGCAGGAAAATGTAGCAAATCTTTGGCTGCATCACATACAG  
ACAAACAAGGATGCAAAACCAGTCATTGCCGCTTATCTGATAACCATGAACATG  
CTAGCACAGACAAAAAAGTTCAAAAGCTGTGTGAGCCTAAAAAATGTTTCGTGCG  
AGAGGTGTGCCTCAAAATGTCAATCTAGCCCTTTC AATTCAGATTCATGTTCAA  
TTCATGTGGGAGCAATAAATGTGCGGACTCAGCAAGGACACACGATGGTTCTGT  
CAGTGATGGATCCCTTGAAGCAAAGCACTGTGACCAGGGTAGCTGTTACATGGT  
CAATGACAAACGTGCAGGAAAATGTTGCAGATCTTCAACTGCATCACATACAGA  
CAAACATGGATGCAAAACCTTTCACGGCCACTCATCTCATAACCATCAACATGCT  
AGCATAGACCAAAAAGTCCAAAAGCCGTGTGCGCCTAAAAAATGTTCCCTCGCAG  
AAGTGTGCCGCAAAATGTCAATCTAGCCCTTTCGGTACAGATTCATGTTCTGCGG  
ACTCAGCAAGGGCACACAATGGTTCTGTTAGTGATAGATCCCATGAAGAAAAGC  
ACTGTGACCAGGGAAGCTGTTGCATGGTCAATGACAAGACTGAGGCACACAATT  
TGTCAGCAACTGTTGTTTCGGGCAATCGGAGTTTGGGCTTGAACACAGAAGATA  
AATGCAGAAAAGCTAGTTACTGCGTAGAAGACCAGCGAGAGACAAAAATTGGTC  
ATTGTCATTCTGTTTATTGCGGTGAAAACCATGTTAAGAACCACACTAACGATAA  
AGCTTTAGGAAACTTGGTAGAACATAGTTCTTCGGAGAGCCTAAATCCAAAGGC  
TTATTCTCATCCACACAAGTGTGTATAGACTACAGTGATCAGCCACCTCACACT  
GCAATAGACATTCCGATGAGTCCAAACTTTGAGGCTGCTAAAGCTCGTACGACTC  
TGGAGAAGAGAGAATTTGGTGGTTGTTGCAAGAGCTATATGAGAGAATGCTGTG  
GTAAGCATGGACATTTTGGACCTGGCCTTGGAGGAGGCTTAGCAGAAATAACCA  
CTGAATAG

*TcHMA3\_SV\_MT151687*

ATGGATGCGAATAAAAACTGCAGAAAAGCTACTTTGATGTGCTGGGTATCTGCT  
GCTCCTCGGAGGTTGCTCAGATAGAAAACATCTTAAAATCCCTTGAAGGCGTCAA  
AGAAGTATCTGTGATTGTTCCCTACCAGAACAGTTATTGTTCTCCATGACAATCTC  
CTCGTTTCTCAGCTTCAAATAGTCAAGGCTCTAAATCAAGCAAGACTGGAAGCAA  
ACGTTTCGAGCGCGTGGGGAGATCAAGTACCAGAAAAAATGGCCCAGCCCTTTTG  
CAATAGCTTGTGGCTTGTGCTTTTGTTCCTGTTGAAGTATGCCTACCATCCA  
TTGCAATGGCTAGCCGTAGGAGCTGTGGCCGTTGGCATCTACCCCATGCTTTTGA  
AGGGCTATGCGGCCGTTAGGAATTTAGGCTCGATATCAACATTCTTATGCTCAG  
TGCAGTGATAGGGAGCGTTGCAATGAAGGACTACACTGAAGCTGGCACTATCGT  
CTTCTCTTACCCTGCAGAAATGGCTTGAGTCAAGAGCAAGCCATAAGGCTACT  
GCTGTTATGTCCTCGTTGATGAGTATAGCTCCTCAGAAAGCAGTCATAGCTGAGA  
CAGGAGAAGAAGTGGATGCCGATGAAGTCAAATTGAGCACTGTTCTCGCAGTTA  
AGGCTGGTGAAGTTATACCCATTGATGGAATTGTTGTAGATGGGAAATGTGAAGT  
GGATGAGAAAACCCTTACTGGTGAATCATTTCAGTTACCAAAGAAAAGGATTC  
AACTGTCTGGGCTGGCACCATCAATCTAAACGGTTACATTAGTGTAAAAACTACT  
GCTGTAGCTGAAGACTGTGTAGTGGCTAAAATGGCGAAGCTAGTGGAGGAAGCT  
CAAAACAGCAAATCTAAAACCCAAAGATTCATAGACAAATGTGCCCAGTTCTAC  
ACCCAGGGTTTCAAGCGTTGAGAGTAAGTCAAGTCATCCAATGGCAGCTGCAC  
TTGTAGAATATGGAAGGTCACATTCCATTGAACCAAACCCTGAAACTGTTGAGG  
ATTATCACAATTTCCCTGGGGAAGGTATTTATGGGAGGATTGATGGCAGAGATAT  
TTACATTGGAAGCAGAAAAATATCACTGAGAGCTCATGGAACAGTTCCAAGTCT  
AGAAGGCAATATGATTGAAGGAAAGACCATTGGATATGTGTTTTCTGGAGCAAC  
CCCTGCTGGAATTTTCAGCCTTTCAGATGCTTGTGCGAACTGGGGCTGCAGAGGCA  
GTCAATGAGCTAAAGTCAATGGGGATAAAAGCTGCTATGCTTACAGGAGATAAT  
CAAGCAGCAGCCATACATGTACAAGAACAGCTAGGGAATCGTCTAGATGAAGTC  
CATGCAGAACTTCTTCCTGAAGACAAGGCAAGAATAATCGAAGAGCTTAGGAAA  
GAGGGGCCAACAGCAATGATTGGAGATGGCATCAATGATGCACCTGCACTTGCT  
ACAGCTGATATTGGTATTTCAATGGGCATTTCCGGTTCAGCACTTGCGACAGAGA  
CAGGGCATGTGATTCTCATGTCAAATGACATTAGAAAAGATACCAAAGCTATCC  
AACTGGCAAGAAAGGCACATAGGAAAGTCATTGAGAATGTCATTTTGTCAATCA  
GTACTAAGGCTGCTATTCTTGCTTTGGCCTTCGCTGGTCATCCACTTGTGTGGGCT  
GCGGTTCTTGCTGATGTTGGCACATGCTTGTGGTATCTGTAATAGCATGCTACT  
TTTGCGAGGAACAGACAAACATGCAGGAAAATGTAGCAAATCTTTGGCTGCATC  
ACATACAGACAAACAAGGATGCAAAAACCAGTCATTGCCGCTTATCTGATAACCA  
TGAACATGCTAGCACAGACAAAAAAGTTCAAAAAGCTGTGTGAGCCTAAAAAATG  
TTCGTCGCAGAGGTGTGCCTCAAATGTCAATCTAGCCCTTTC AATTCAGATTCA  
TGTTCAAATTCATGTGGGAGCAATAAATGTGCGGACTCAGCAAGGACACACGAT  
GGTTCTGTGATGATGGATCCCTTGAAGCAAAGCACTGTGACCAGGGTAGCTGTT  
ACATGGTCAATGACAAACGTGCAGGAAAATGTTGCAGATCTTCAACTGCATCAC  
ATACAGACAAACATGGATGCAAAAACCTTTCACGGCCACTCATCTCATAACCATCA  
ACATGCTAGCATAGACCAAAAAGTCCAAAAGCCGTGTGCGCCTAAAAAATGTTT  
CTCGCAGAAGTGTGCCGAAAATGTCAATCTAGCCCTTTCGGTACAGATTCATGT

TCTGCGGACTCAGCAAGGGCACACAATGGTTCTGTTAGTGATAGATCCCATGAA  
GAAAAGCACTGTGACCAGGGAAGCTGTTGCATGGTCAATGACAAGACTGAGGCA  
CACAATTTGTCCAGCAACTGTTGTTCCGGCAATCGGAGTTTGGGCTTGAACACAG  
AAGATAAATGCAGAAAAGCTAGTTACTGCGTAGAAGACCAGCGAGAGACAAAA  
ATTGGTCATTGTCATTCTGTTCAATTGCGGTGAAAACCATGTTAAGAACCACACTA  
ACGATAAAGCTTTAGGAACTTGGTAGAACATAGTTCTTCCGGAGAGCCTAAATC  
CAAAGGCTTATTCTCATCCACACAAGTGTGTATAGACTACAGTGATCAGCCACC  
TCACACTGCAATAGACATTCCGATGAGTCCAACTTTGAGGCTGCTAAAGCTCGT  
ACGACTCTGGAGAAGAGAGAATTTGGTGGTTGTTGCAAGAGCTATATGAGAGAA  
TGCTGTGGTAAGCATGGACATTTTGGACCTGGCCTTGGAGGAGGCTTAGCAGAA  
ATAACCACTGAATAG

***TcNRAMP5\_MH615049***

ATGGGAAGTTTGCAGCAGCAAGCGACTGACCTTGCACTTCCAAAATCATGGGGT  
GGAGGGAGCAACTGTATAGCTGCTGTCAATGTGGAGGGAAGCACCCCGGAATCC  
TTCCCTAGTAACGACAACAAAAGCAGTGATCATGATCATGACCAGATCATGAG  
AAACCTGGATGGAGAAAGTTTTTGTCAATTTGTAGGCCCTGGTTTCCTTGTCTCATT  
AGCTTATCTTGATCCTGGCAACCTGGAACTGATATGCAAGCAGGAGCCAACCA  
TGGATATGAGCTACTGTGGGTGGTGTAAATTGGATTAGTGTTTGCTCTCATAATCC  
AGTCTCTTGCTGCTAATCTTGGAGTCAGCACTGGCAAGCACTTATCAGAATTGTG  
CAAGGCTGAGTACCCAGTATTGATCAAATATTGCCTGTGGTTGCTTGCAGAGCTT  
GCTGTATAGCTGCTGATATTCCTGAAGTGATTGGGACAGCCTTTGCATTAAATA  
TACTGTTTCATGTCCCAGTTTGGGCTGGGGTTCTCTGCACTGGTTTAAGCACTCTC  
CTCCTCCTGAGCCTGCAAAGATATGGGATAAAGGAAGCTGGAAATGCTGATAGCG  
GTGATGGTTTTTTGTAATGGCCGCATGTTTCTTTGGGGAAATGAGTTATGTA AAC  
CTCCGGCGACTGGTGTCTTAAGGGCATGTTTGTGCCAAGCTTTCCGGCCAAGG  
AGCCACCGGCGACGCTATTGCCCTCTTGGGCGCCCTTGTTATGCCGCACAATCTC  
TTTCTCCACTCTGCTCTCGTGCTCTCCAGAAAAGTACCCAACCTCTGTTTCGTGGCAT  
CAATGCTGCGTGTAGATATTCCTGATGGAGAGCGGCTTCGCCTTGTTTGTGGCG  
TTTTTGATCAACGTAGCGGTTGTCTCGGTGACGGGCACCGTCTGCTTAGCCGATA  
ATCTCTCTAGTGAAGACCAGGATCGTTGCAGCAATCTTACCCTCGACTCTGCTTC  
TTTCATGCTCCAGCATGTGCTGGGAAAGTCTAGCTCAACCCTTTACGCCGTTGCA  
CTTCTTGCCCTCGGGGCAAAGCTCTACAATTACAGGCACTTATGCAGGACAATTA  
TCATGCAGGGCTTCTTGGATCTTAAAATGAAGAAATGGGTGAGGAACTTAATGA  
CTAGGAGCATTGCCATTACACCCAGTCTTATTGTGTCCATCATTGGTGGATCTCA  
AGGGGCCGGTAGACTAATCATCATTGCATCGATGATTCTATCATTGAGCTGCCA  
TTTGTCTCATCCCCTTCTGAAATTCAGTAGCAGCTCAACCAAGATGGGACCGT  
ACAAGAATTCTATATATATCATTGTGATTTTCATGGATACTAGGCCTTGGAAATCAT  
CGGTATCAACGTCTATTACTTGAGCACAGCCTTTGTAGGTTGGTTGATTCACAAT  
GATTTACCAAAGTCGGAAATGTTTTTCATCGGAATCATCGTGTTTCTCTAATGG  
CCATCTACATCCTGTCAGTCATCTATCTAACCTTCCGAAAGGACACTGTTGTAAC  
ATATATCGAGCCCGACAAGAACGACCCAACCTGCCAAGCTCGGATGGAGAGTGG

GCTCAGCAACCTTGACGGGTCCTTCCGGGCAGACAATGTCCCTTACAGGCAGGAT  
TTAGCTGACATAACCACTGCCAGAGTAG

*PtMt2b\_MN974475*

ATGTCTTGCTGTGGAGGAACTGTGGCTGCGGCTCTGGATGCAAGTGCGGCAGT  
GGCTGCAATGGATGCAGCATGTACCCAGACTTGAGTTTCTCCGAGACCACCACA  
AGTCAGACAATCATTGCTGGTGTAGCTCCAGTTAGGATGTTCTACGAGAGCTCTG  
AGATGAACTTTGGTGCTGAGAATGGCTGCAAATGTGGATCAAACCTGCACCTGTG  
ATCCATGCTCCTGCAAATGA

## References

1. Abouchami, W. *et al.* A Common Reference Material for Cadmium Isotope Studies - NIST SRM 3108. *Geostand. Geoanalytical Res.* **37**, 5–17 (2013).
2. Barraza, F. *et al.* Cadmium isotope fractionation in the soil – cacao systems of Ecuador: a pilot field study. *RSC Adv.* **9**, 34011–34022 (2019).
3. Wigganhauser, M. *et al.* Cadmium isotope fractionation in soil–wheat systems. *Environ. Sci. Technol.* **50**, 9223–9231 (2016).
4. Imseng, M. *et al.* Towards an understanding of the Cd isotope fractionation during transfer from the soil to the cereal grain. *Environ. Pollut.* **244**, 834–844 (2019).
5. Wei, R. *et al.* Stable isotope fractionation during uptake and translocation of cadmium by tolerant *Ricinus communis* and hyperaccumulator *Solanum nigrum* as influenced by EDTA. *Environ. Pollut.* **236**, 634–644 (2018).
